# Supplementary material for: Exploitation of Other Social Amoebae by Dictyostelium caveatum
Source: PubMed Central journal article supplement (PMC1790701; doi:10.1371/journal.pone.0000212), 2007-02-14
Supplement: pone.0000212.s001.pdf [file pone.0000212.s001.pdf]

**Table S1**

|                        | % of structures at the aggregate stage |                       |                       |
|------------------------|----------------------------------------|-----------------------|-----------------------|
|                        | Development                            | Mix 1-10 <sup>3</sup> | Mix 1-10 <sup>4</sup> |
| <i>D. aureostipes</i>  | 41 (31)                                | 91 (8)                | 45 (10)               |
| <i>D. fasciculatum</i> | 16 (12)                                | 71 (26)               | 51 (31)               |
| <i>D. mucoroides</i>   | 59 (21)                                | 88 (14)               | 58 (37)               |
| <i>D. rosarium</i>     | 0 (0)                                  | 57 (43)               | 8 (7)                 |
